# Supplementary material for: A Plant-Derived Alkanol Induces Teliospore Germination in Sporisorium scitamineum
Source: MDPI journal article supplement (doi:10.3390/jof8020209), 2022-02-21
Supplement: s1 [file s1]

**Table S1** Primers used for RT-qPCR of differentially expressed genes

| Primer Name | Sense Primer/Anti-sense Primer (5'-3')      |
|-------------|---------------------------------------------|
| SPSC_02892  | AACGTGTAGAGAGGTTCCGC/ GTCGCACTTATTCCCGACGA  |
| SPSC_04357  | TCACCCTGGAGATTTTGGGC/ GGTTTGCGTTGGGGAACATC  |
| SPSC_00663  | TCACGCATACCAGGACGAAG/ CATCTGTGATTGCGGTGTGC  |
| SPSC_01014  | CTCATCCTGGCACCCGTC/ ACAGCGTCTCCGAGTCAAG     |
| SPSC_01015  | TCATTGACTCGAAGGAGGCG/ AGTTGATCACCACACGGTCG  |
| SPSC_01225  | GTTGGGTCATTTGGGCGTTC/ AGTCGACAAAGACCTCACAAC |
| S10         | CGTTGCAGGACATGGGTGTG/ TTCTCGTAGCTGTGCAGACCA |
| S11         | GAATGCTTGGAGGCATGGGG/ GCGGGTTCATAGGGTCCTTC  |
