# Supplementary material for: A Plant-Derived Alkanol Induces Teliospore Germination in Sporisorium scitamineum
Source: MDPI journal article supplement (doi:10.3390/jof8020209), 2022-02-21
Supplement: s1 [file s1]

Table S2 Sample names and clean data statistics from Nanopore sequencing

| Sample Name | Read Num | Base Num | N50  | Mean Length | Max Length | Full-Length Percentage |
|-------------|----------|----------|------|-------------|------------|------------------------|
| CK-1        | 6705532  | 5.56E+09 | 1095 | 828         | 146210     | 84.09%                 |
| CK-2        | 6499795  | 5.49E+09 | 1099 | 844         | 103886     | 81.75%                 |
| CK-3        | 7482928  | 5.99E+09 | 1029 | 800         | 112410     | 79.23%                 |
| T1-1        | 5257205  | 8.03E+09 | 2837 | 1527        | 44347      | 66.80%                 |
| T1-2        | 7081533  | 8.21E+09 | 2015 | 1159        | 51438      | 76.12%                 |
| T1-3        | 5808103  | 7.74E+09 | 2091 | 1333        | 42202      | 75.85%                 |
| T2-1        | 7741259  | 8.96E+09 | 1487 | 1157        | 48445      | 84.25%                 |
| T2-2        | 6800532  | 8.26E+09 | 1573 | 1215        | 105064     | 84.41%                 |
| T2-3        | 6854563  | 7.76E+09 | 1396 | 1132        | 38646      | 83.47%                 |
| T3-1        | 9256639  | 6.37E+09 | 729  | 688         | 34692      | 86.53%                 |
| T3-2        | 5908754  | 7.87E+09 | 2117 | 1331        | 141404     | 71.59%                 |
| T3-3        | 8896726  | 7.23E+09 | 1130 | 813         | 80184      | 76.07%                 |
